# Supplementary material for: Gut microbiota dysbiosis in male patients with chronic traumatic complete spinal cord injury
Source: J Transl Med. 2018 Dec 13;16:353. doi: 10.1186/s12967-018-1735-9 (PMC6293533; doi:10.1186/s12967-018-1735-9)
Supplement: Supplementary file 5 — Additional file 5. RDA/CCA showed that BMI, GLU and HDL significantly affected bacterial composition in genus level between the healthy male and SCI groups. [file 12967_2018_1735_MOESM5_ESM.xls]

## Sheet: 物种主成分解释度表
	RDA1	RDA2	r2	p_values
BMI	-0.0691	0.9976	0.0971	0.04
ALT	0.9981	0.0611	0.007	0.77
AST	0.2295	0.9733	0.0108	0.694
GLU	-0.011	-0.9999	0.108	0.044
TG	-0.9898	-0.1425	0.0685	0.091
TCHO	0.5728	-0.8197	0.0657	0.115
HDL	0.6872	-0.7264	0.3044	0.001
LDL	0.6578	-0.7532	0.0314	0.352
UREA	0.9571	-0.2898	0.0317	0.36
CR	0.1413	0.99	0.0844	0.059
UA	-0.9982	-0.0592	0.0645	0.13
AGE	-0.8566	0.5161	0.0408	0.246
